# Supplementary material for: Seed-assisted synthesis of a nanosheet-assembled hierarchical SSZ-13 zeolite by coupling a small amount of TMAdaOH with TPOAC
Source: Royal Society of Chemistry journal article supplement (doi:10.1039/d4nj01060d), 2024-01-01
Supplement: d4nj01060d1.pdf [file d4nj01060d1.pdf]

1                    Electronic Supplementary Information

2    Seed-assisted synthesis of a nanosheet-assembled  
3    hierarchical SSZ-13 zeolite by coupling a small  
4    amount of TMAdaOH with TPOAC

5

6    *Huifang Zhang*<sup>a</sup>, *Qiuyu An*<sup>a</sup>, *Feng Yu*<sup>a</sup>, *Binbin Fan*<sup>\*a</sup>

7    <sup>a</sup> College of Chemical Engineering and Technology, Taiyuan University of Technology,

8    Taiyuan 030024, P.R. China

9    \* Corresponding authors: Binbin Fan

10   E-mail: fanbinbin@tyut.edu.cn

11

## 1 S1. Experimental

### 2 S1.1. Chemicals

3 Sodium hydroxide (NaOH, AR, 96%) was purchased from Kermel. Sodium aluminate  
4 ( $\text{NaAlO}_2$ , CP) was obtained from Shanghai Test Chemical Reagents. *N,N,N*-trimethyl-1-  
5 adamantanamine hydroxide (TMAdaOH, 25 wt% in water) was purchased from Energy  
6 Chemical. Octadecyl-(3-trimethoxysilylpropyl)-ammonium chloride (TPOAC, 65 wt% in  
7 water) and ammonium chloride ( $\text{NH}_4\text{Cl}$ , AR, 99.5%) were acquired from Macklin. Colloidal  
8 silica (Ludox<sup>®</sup>HS-40) was purchased from Sigma-Aldrich. Potassium bromide (KBr),  
9 aluminum isopropoxide (AR, 98%), fumed silica were purchased from Aladdin.  
10 Chloroplatinate hexahydrate ( $\text{H}_2\text{PtCl}_6 \cdot 6\text{H}_2\text{O}$ , 38-40% Pt) was obtained from J&K Scientific.  
11 Distilled water is home made in the lab.

### 12 S1.2. Synthesis of SSZ-13 Samples

13 Synthesis of SSZ-13 seed. SSZ-13 seed was synthesized following the reported literature<sup>1</sup>  
14 with some modifications. Specifically, 0.48 g NaOH and 10.2 g TMAdaOH were dissolved in  
15 40 mL deionized water. Subsequently, 0.98 g aluminum isopropoxide was added and followed  
16 by introducing 3.2 g fumed silica to the mixture. The resultant aluminosilicate gel (gel molar  
17 composition was as follows:  $\text{SiO}_2 : \text{Al}_2\text{O}_3 : \text{Na}_2\text{O} : \text{TMAdaOH} : \text{H}_2\text{O} = 1 : 0.045 : 0.12 : 0.23 :$   
18 42) was stirred for 4 h at room temperature and transferred into a 100 mL Teflon-lined stainless-  
19 steel autoclave and crystallized statically at 150 °C for 96 h. The recovered solid product was  
20 washed, dried at 100 °C overnight and the dried solid powder was named as SSZ-13 seed.

21 Synthesis of SSZ-13-TP<sub>0</sub>(r) and SSZ-13-TP<sub>0.03</sub>(r) samples. The SSZ-13-TP<sub>0</sub>(r) and SSZ-13-

1 TP<sub>0.03(r)</sub> samples with the different Si/Al ratios (5.5, 22, 33 and 55) were synthesized by  
2 changing the amount of NaAlO<sub>2</sub> (0.6, 0.15, 0.1 and 0.06 g).

3 Synthesis of SSZ-13-TP<sub>0</sub>-C and SSZ-13-TP<sub>0.03</sub>-C. SSZ-13-TP<sub>0</sub>-C and SSZ-13-TP<sub>0.03</sub>-C were  
4 synthesized in the synthesis system with TMAdaOH/SiO<sub>2</sub> = 0.23 in the absence or presence of  
5 TPOAC. The detailed synthesis procedures of SSZ-13-TP<sub>0</sub>-C and SSZ-13-TP<sub>0.03</sub>-C are as  
6 follows. 0.48 g of NaOH, 5.1 g of TMAdaOH and 0.3 g of NaAlO<sub>2</sub> were first dissolved into  
7 14.5 mL of deionized water followed by stirring for 1 h at room temperature (in the absence or  
8 presence of 0.55 g of TPOAC). Then, 0.16 g of SSZ-13 seed that previously synthesized was  
9 added into the clear solution. Subsequently, 4 g of colloidal silica was slowly added and the  
10 mixture was stirred for further 4 h. The resultant aluminosilicate gel (gel molar composition  
11 was as follows: SiO<sub>2</sub> : Al<sub>2</sub>O<sub>3</sub> : Na<sub>2</sub>O : TMAdaOH : TPOAC : H<sub>2</sub>O = 1 : 0.045 : 0.28 : 0.23 : 0 or  
12 0.03 : 42) was transferred into a 50 mL Teflon-lined stainless-steel autoclave and crystallized  
13 statically at 150 °C for 96 h. The product was washed and dried at 100 °C overnight. The  
14 obtained sample were denoted as SSZ-13-TP<sub>0</sub>-C and SSZ-13-TP<sub>0.03</sub>-C, respectively.

15 Synthesis of SSZ-13-TP<sub>0.03</sub>-N and SSZ-13-TP<sub>0.03</sub>-CN. These samples were synthesized in  
16 the absence of seed in the synthesis system with TMAdaOH/SiO<sub>2</sub> = 0.04 or 0.23, respectively.  
17 “N” stands for the synthesis system in the absence of seed.

18 Synthesis of SSZ-13-C. SSZ-13-C was synthesized in the system with TMAdaOH/SiO<sub>2</sub> =  
19 0.23 in the absence of TPOAC and seed. The detailed synthesis procedures are as follows. 0.48  
20 g of NaOH, 5.1 g of TMAdaOH and 0.3 g of NaAlO<sub>2</sub> were first dissolved into 14.5 mL of  
21 deionized water followed by stirring for 1 h at room temperature. Subsequently, 4 g of colloidal

1 silica was slowly added and the mixture was stirred for further 4 h. The resultant  
2 aluminosilicate gel was transferred into a 50 mL Teflon-lined stainless-steel autoclave and  
3 crystallized statically at 150 °C for 96 h. The product was washed and dried at 100 °C overnight.  
4 The obtained sample were denoted as SSZ-13-C.

5 Synthesis of H-SSZ-13. H-SSZ-13 samples were prepared by ion-exchange method. H-SSZ-  
6 13 sample (initial gel Si/Al ratio = 11) was ammonium-exchanged with 1 M NH<sub>4</sub>Cl  
7 (solid/liquid = 20) at 60 °C for 3 h for three times. The solid product recovered by filtering was  
8 washed with distilled water for three times, dried at 100 °C overnight and calcined at 550 °C  
9 for 6 h.

10 Preparation of Pt/SSZ-13 catalysts. Pt/SSZ-13 catalysts were prepared by impregnation  
11 method. 266 μL of H<sub>2</sub>PtCl<sub>6</sub>·6H<sub>2</sub>O solution (1g/50 mL) was added to 20 mL deionized water,  
12 followed by adding 1 g of H-SSZ-13 to the above solution and stirring at 30 °C for 24 h. The  
13 solvent was removed by rotary evaporation at 50 °C. The obtained solid was dried at 100 °C  
14 overnight, calcined at 350 °C for 4 h in air and reduced at 350 °C for 2 h in H<sub>2</sub>. The Pt contents  
15 in all Pt/SSZ-13 catalysts were 0.2 wt.%. 0.2%Pt/Al<sub>2</sub>O<sub>3</sub> and 0.2%Pt/SiO<sub>2</sub> were also prepared  
16 by using the above impregnation method.

### 17 **S1.3. Characterization**

18 Power X-ray diffraction (XRD) was tested on a Shimadzu XRD-6000 X-ray diffractometer  
19 using Cu Kα radiation. Scanning electron microscopy (SEM) was recorded on a Hitachi S-  
20 4800. N<sub>2</sub> adsorption/desorption was measured on a Quantachrome NOVA1200e. 0.05-0.1 g  
21 sample was degassed under vacuum at 300 °C for 3 h prior to the adsorption measurements.

1  $S_{\text{mic}}$  (micropore area) and  $V_{\text{mic}}$  (micropore volume) were calculated through the t-plot method.  
2  $S_{\text{BET}}$  (total surface area) and  $V_{\text{tot}}$  (total volume) were calculated using the BET equation and  
3 DFT method, respectively. The contents of Si and Al were analyzed by a Thermo iCPA6300  
4 inductively coupled plasma atomic emission spectrometer (ICP-AES).  $^{27}\text{Al}$  MAS NMR spectra  
5 were obtained at 156 MHz on a Bruker 600M spectrometer. The samples were spun at 12 kHz  
6 using 4 mm rotors. Fourier transform infrared spectroscopy (FT-IR) spectra were collected on  
7 a SHI-MADZU FTIR-Affinity-1 spectrometer. Temperature-programmed desorption of  
8 ammonia ( $\text{NH}_3$ -TPD) was tested on a Tianjin Xianquan TP-5080D. 0.1 g sample was purged  
9 with He at 500 °C for 2 h. After cooling down to 120 °C, 1% $\text{NH}_3$ /He was flowed through the  
10 sample for 1 h at a rate of 15 mL/min, and then purged with He for 0.5 h. Finally, the sample  
11 was heated in He from 120 to 700 °C. The amount of  $\text{NH}_3$  desorption was recorded by a TCD.  
12 Transmission electron microscopy (TEM) was performed on a JEOL JEM-F200 to observe the  
13 thickness of crystals and distribution of Pt NPs.  $\text{H}_2$ -pulse was conducted on a Sorb-91x to test  
14 the dispersion of Pt NPs. 0.1 g sample was first reduced with 10%  $\text{H}_2$ /Ar at 350 °C for 1 h, and  
15 then flushed with Ar at 350 °C for 1 h. After cooling down to 40 °C, 10%  $\text{H}_2$ /Ar was injected  
16 into the U-tube reactor at regular intervals until the sample was saturated with  $\text{H}_2$ . X-ray  
17 photoelectron spectroscopy (XPS) analysis of Pt 4d orbit was conducted on a Thermo Fisher  
18 ESCALAB 250 xi spectrometer using Al  $K\alpha$  radiation. All spectra were calibrated utilizing the  
19 C 1s peak at 284.8 eV.

#### 20 **S1.4. Hydrogenation of naphthalene**

21 The liquid phase hydrogenation of naphthalene was conducted in a 50 mL stainless autoclave

1 reactor. The catalytic reaction was carried out by following the given procedure: 0.05 g of  
 2 milled catalyst, 5 mL of cyclohexane and 0.1 g of naphthalene were mixed and placed in the  
 3 autoclave reactor. After purification with H<sub>2</sub> for three times, the reactor was pressurized to 2  
 4 MPa and heated to 230 °C while stirring at 600 rpm. The collected liquid products were  
 5 analyzed on a gas chromatograph (Agilent 7820A) with an HP-5 capillary column (30 m × 0.32  
 6 mm × 0.25 μm).

7

8 **Table S1** BET and textural parameters of SSZ-13 samples

| Sample                         | $S_{\text{BET}}$<br>(m <sup>2</sup> ·g <sup>-1</sup> ) | $S_{\text{mic}}$<br>(m <sup>2</sup> ·g <sup>-1</sup> ) | $S_{\text{ext}}$<br>(m <sup>2</sup> ·g <sup>-1</sup> ) | $V_{\text{tot}}$<br>(cm <sup>3</sup> ·g <sup>-1</sup> ) | $V_{\text{mic}}$<br>(cm <sup>3</sup> ·g <sup>-1</sup> ) | $V_{\text{meso}}$<br>(cm <sup>3</sup> ·g <sup>-1</sup> ) |
|--------------------------------|--------------------------------------------------------|--------------------------------------------------------|--------------------------------------------------------|---------------------------------------------------------|---------------------------------------------------------|----------------------------------------------------------|
| SSZ-13-TP <sub>0</sub> (22)    | 792                                                    | 752                                                    | 40                                                     | 0.38                                                    | 0.29                                                    | 0.09                                                     |
| SSZ-13-TP <sub>0</sub> (33)    | 766                                                    | 733                                                    | 33                                                     | 0.36                                                    | 0.28                                                    | 0.08                                                     |
| SSZ-13-TP <sub>0.03</sub> (22) | 778                                                    | 707                                                    | 71                                                     | 0.40                                                    | 0.27                                                    | 0.13                                                     |
| SSZ-13-TP <sub>0.03</sub> (33) | 793                                                    | 722                                                    | 71                                                     | 0.45                                                    | 0.27                                                    | 0.18                                                     |
| SSZ-13-TP <sub>0</sub> -C      | 668                                                    | 625                                                    | 43                                                     | 0.33                                                    | 0.23                                                    | 0.10                                                     |
| SSZ-13-TP <sub>0.03</sub> -C   | 655                                                    | 553                                                    | 102                                                    | 0.50                                                    | 0.21                                                    | 0.29                                                     |
| SSZ-13-C                       | 706                                                    | 673                                                    | 33                                                     | 0.33                                                    | 0.25                                                    | 0.08                                                     |
| SSZ-13-TP <sub>0.015</sub>     | 759                                                    | 714                                                    | 45                                                     | 0.40                                                    | 0.27                                                    | 0.13                                                     |
| SSZ-13-TP <sub>0.06</sub>      | 721                                                    | 640                                                    | 81                                                     | 0.42                                                    | 0.24                                                    | 0.18                                                     |

9

10

## 1 **Figures**

- 2 **Fig. S1** XRD pattern and SEM image of SSZ-13 seed.
- 3 **Fig. S2** SEM images of SSZ-13-TP<sub>0</sub>-y h and SSZ-13-TP<sub>0.03</sub>-y h samples.
- 4 **Fig. S3** FT-IR spectra of (a and c) SSZ-13-TP<sub>0</sub>-y h and (b and d) SSZ-13-TP<sub>0.03</sub>-y h samples.
- 5 **Fig. S4** XRD patterns SSZ-13-TP<sub>0</sub>(r) and SSZ-13-TP<sub>0.03</sub>(r) samples.
- 6 **Fig. S5** SEM images of SSZ-13-TP<sub>0</sub>(r) and SSZ-13-TP<sub>0.03</sub>(r) samples.
- 7 **Fig. S6** XRD patterns of SSZ-13-TP<sub>x</sub> samples.
- 8 **Fig. S7** SEM images of SSZ-13-TP<sub>x</sub> samples.
- 9 **Fig. S8** XRD patterns of SSZ-13-TP<sub>0</sub>-C and SSZ-13-TP<sub>0.03</sub>-C.
- 10 **Fig. S9** XRD patterns of SSZ-13-TP<sub>0.03</sub>-N and SSZ-13-TP<sub>0.03</sub>-CN.
- 11 **Fig. S10** XRD pattern of SSZ-13-C.

12

13

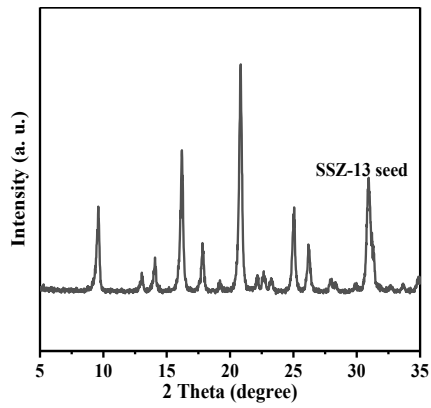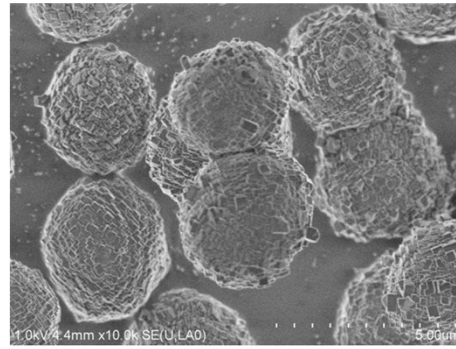

1

2

**Fig. S1** XRD pattern and SEM image of SSZ-13 seed.

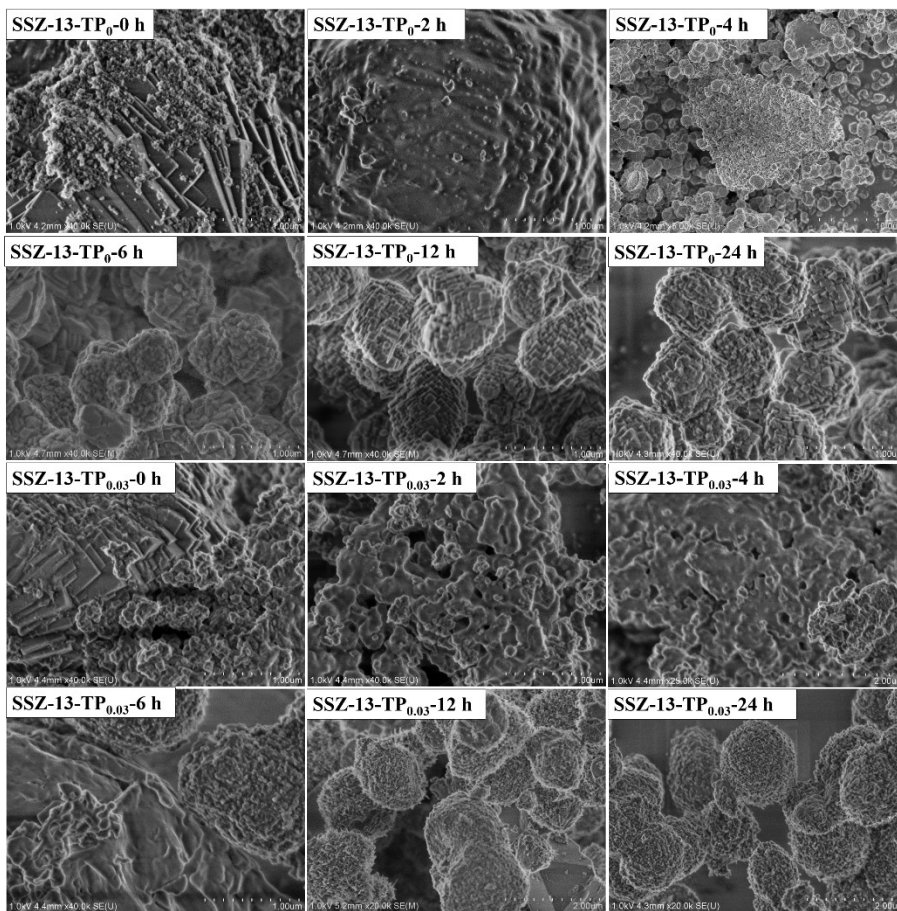

3

4

**Fig. S2** SEM images of SSZ-13-TP<sub>0</sub>-y h and SSZ-13-TP<sub>0.03</sub>-y h samples.

5



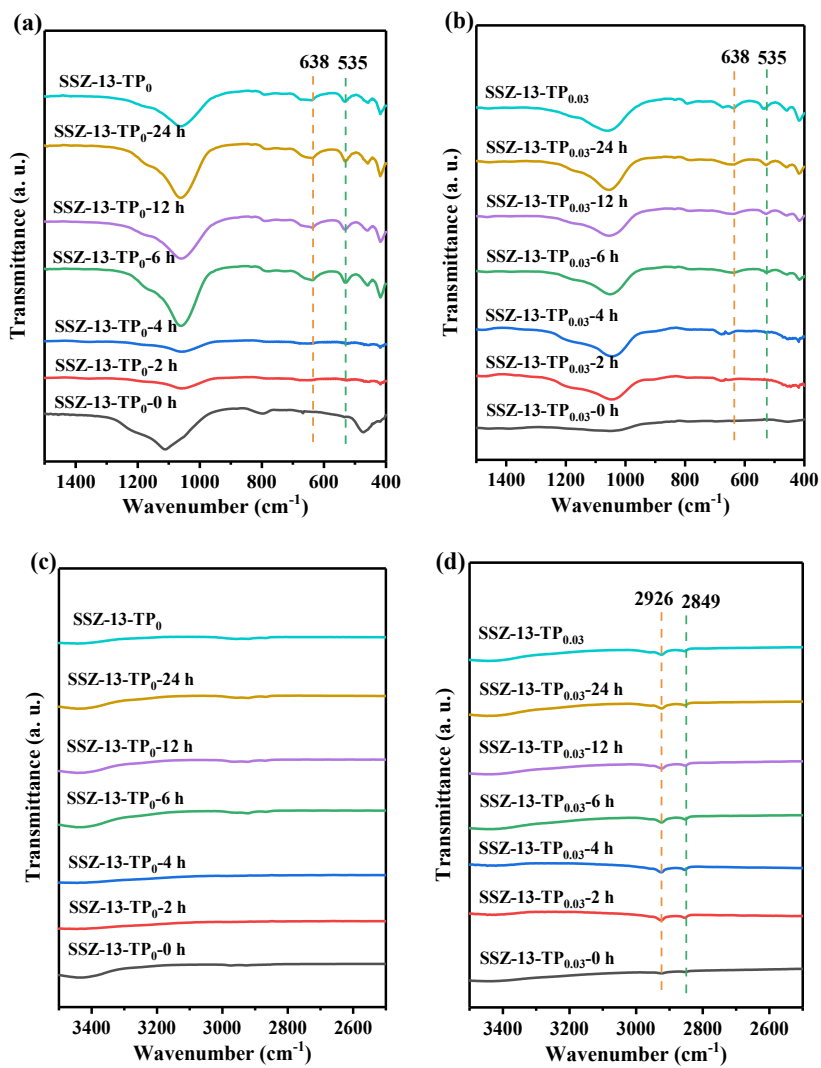

1

2

3 **Fig. S3** FT-IR spectra of (a and c) SSZ-13-TP<sub>0</sub>-y h and (b and d) SSZ-13-TP<sub>0.03</sub>-y h samples.

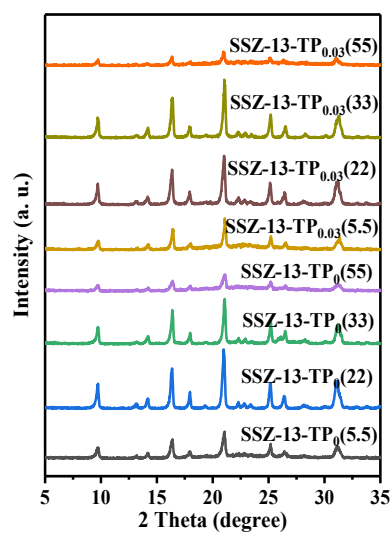

4

5

**Fig. S4** XRD patterns SSZ-13-TP<sub>0</sub>(r) and SSZ-13-TP<sub>0.03</sub>(r) samples.

6

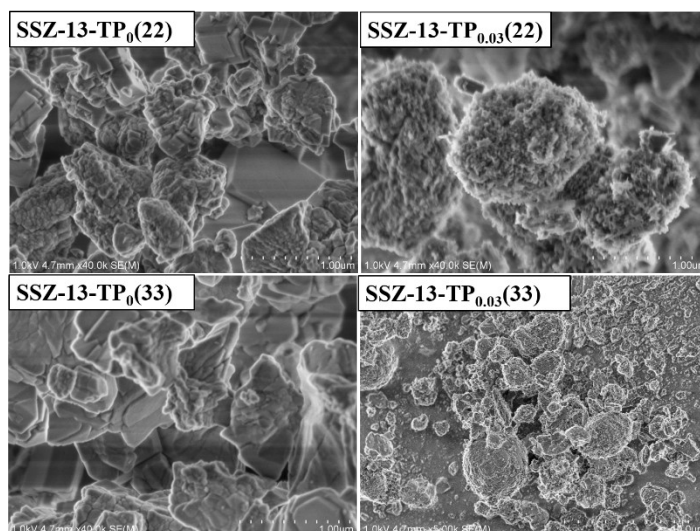

1

2

**Fig. S5** SEM images of SSZ-13-TP<sub>0</sub>(r) and SSZ-13-TP<sub>0.03</sub>(r) samples.

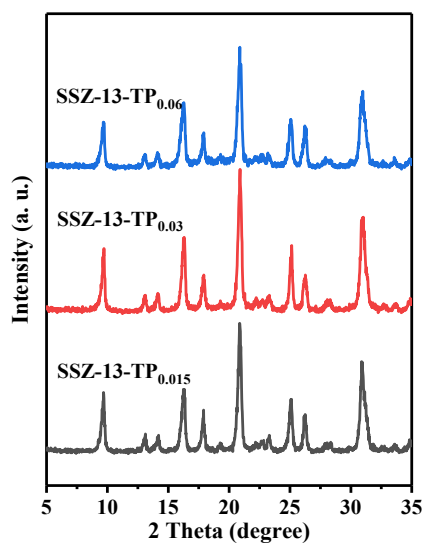

3

4

**Fig. S6** XRD patterns of SSZ-13-TP<sub>x</sub> samples.

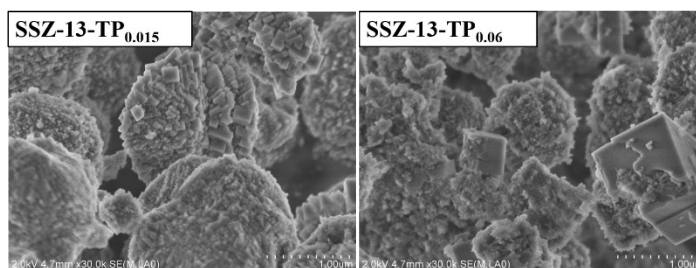

5

6

**Fig. S7** SEM images of SSZ-13-TP<sub>x</sub> samples.

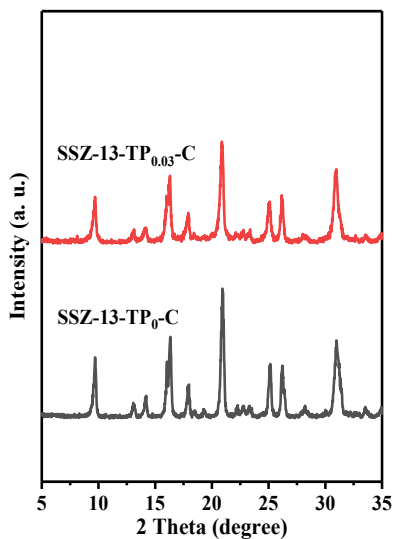

1

2

**Fig. S8** XRD patterns of SSZ-13-TP<sub>0</sub>-C and SSZ-13-TP<sub>0.03</sub>-C.

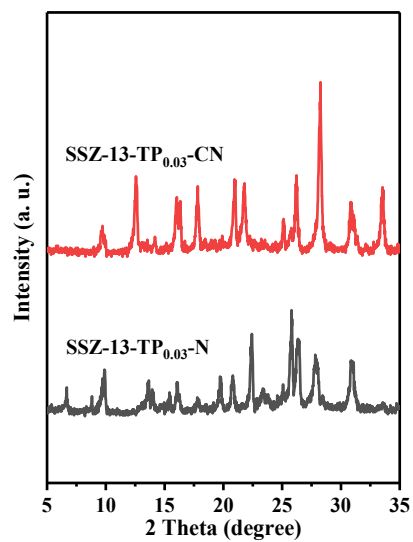

3

4

**Fig. S9** XRD patterns of SSZ-13-TP<sub>0.03</sub>-N and SSZ-13-TP<sub>0.03</sub>-CN.

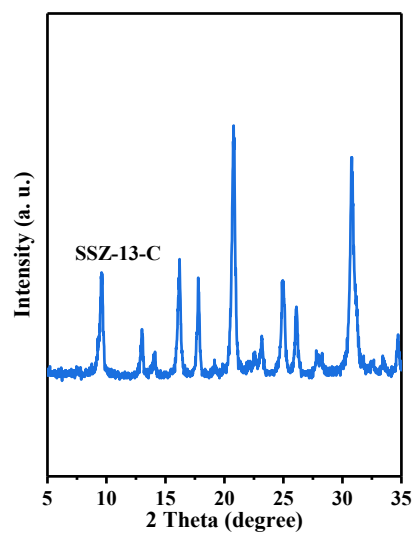

1

2

**Fig. S10** XRD pattern of SSZ-13-C.

3

#### 4 Reference

5 1 Z. Xu, J. Li, Y. Huang, H. Ma, W. Qian, H. Zhang and W. Ying, *Catal. Sci. Technol.*,

6 2019, **9**, 2888–2897.

7
